# Supplementary material for: Anti-Estrogenic Activity of Guajadial Fraction, from Guava Leaves (Psidium guajava L.)
Source: PubMed Central journal article supplement (PMC7181212; doi:10.3390/molecules25071525), 2020-03-27
Supplement: molecules-25-01525-s001.pdf [file molecules-25-01525-s001.pdf]

## Molecules

### **Antiestrogenic activity of Guajadial fraction, from Guava Leaves (*Psidium guajava* L.)**

Jaqueline Moraes Bazioli <sup>1,2</sup>, Jonas Henrique Costa <sup>2</sup>, Larissa Shiozawa <sup>1</sup>, Ana Lúcia Tasca Gois Ruiz<sup>1</sup>, Mary Ann Foglio<sup>1</sup>, João Ernesto de Carvalho<sup>1,\*</sup>

<sup>1</sup> Faculty of Pharmaceutical Sciences, Universidade Estadual de Campinas, 13083-859 Campinas, SP, Brazil

<sup>2</sup> Institute of Chemistry, Universidade Estadual de Campinas, CP 6154, 13083-970 Campinas, SP, Brazil

\*[carvalho@fcf.unicamp.br](mailto:carvalho@fcf.unicamp.br)

**Supplementary Material**

## 2. Material and methods

### 2.5. Chromatographic analysis

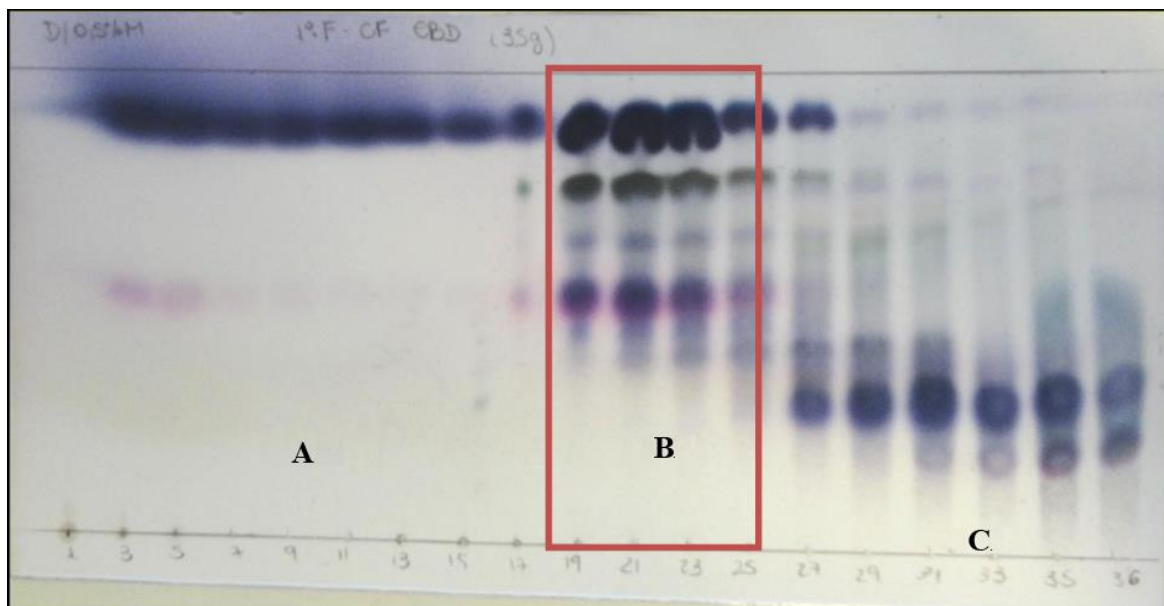

**Figure S1.** Representation of TLC showing fractions A, B and C obtained from DCE extract.

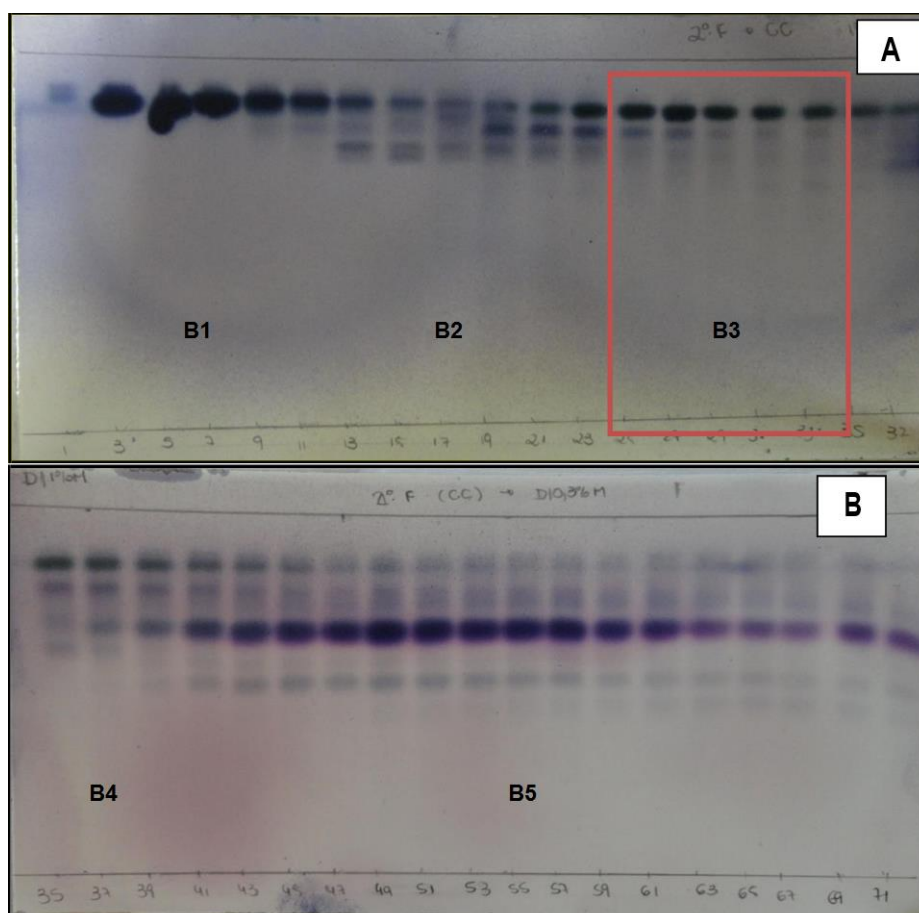

**Figure S2.** Representation of TLC showing fractions A) B1, B2, B3 and B) B4 and B5 obtained from B fraction.

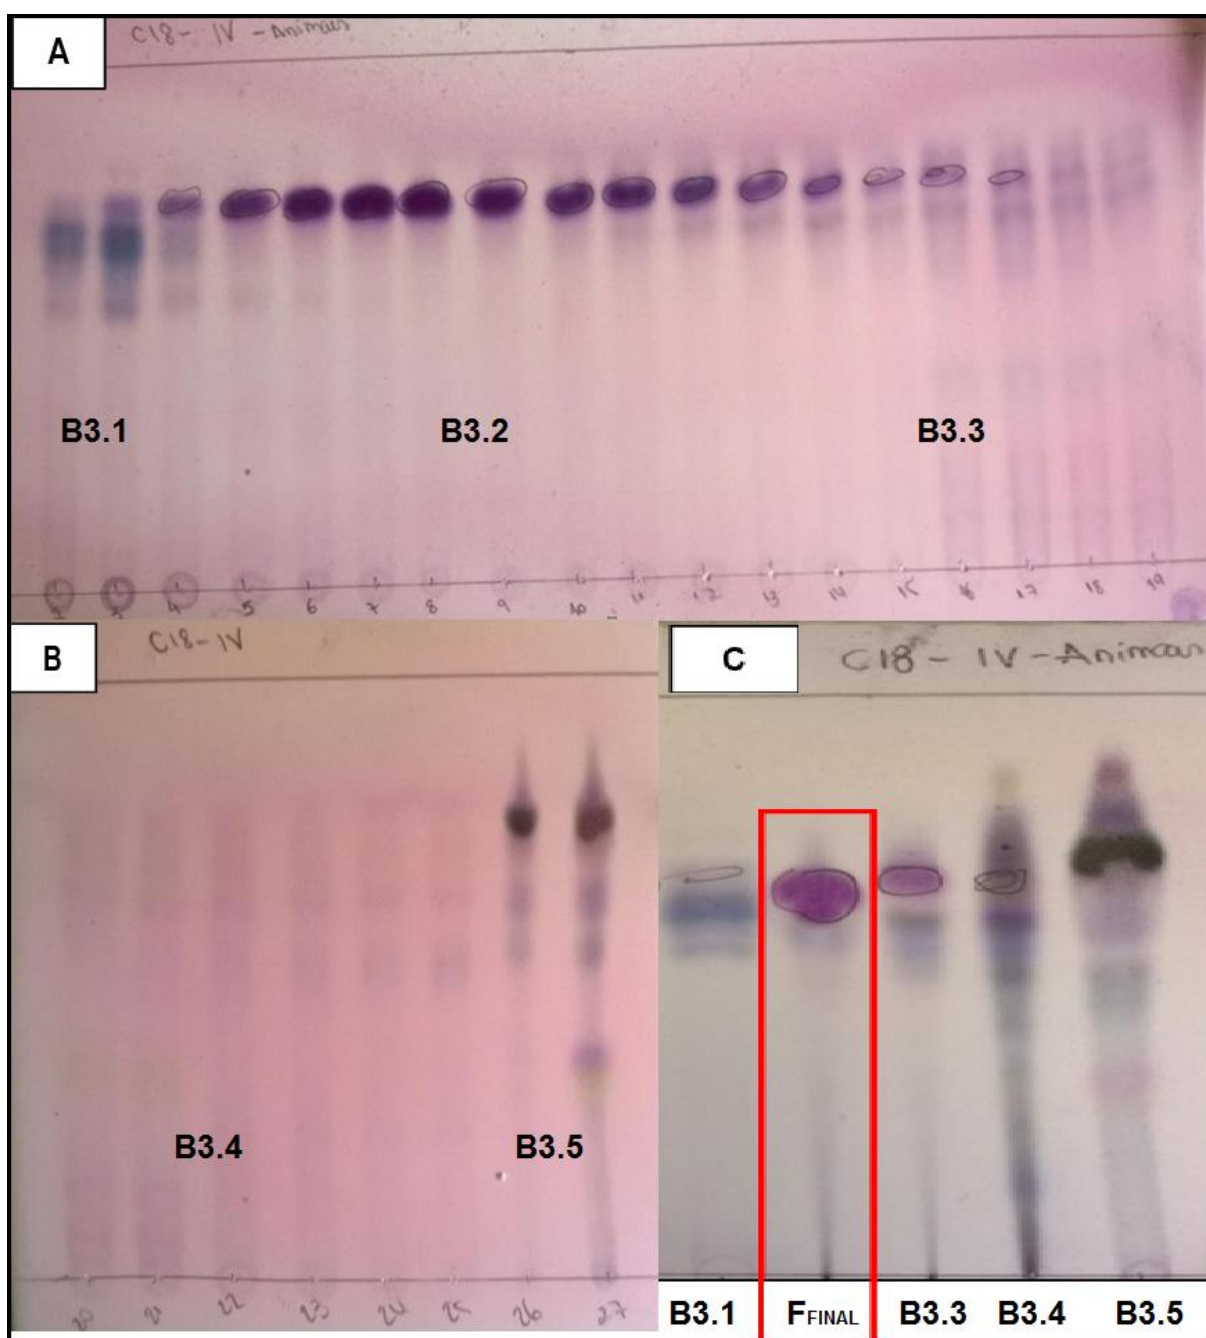

**Figure S3.** Representation of TLC showing fractions A) B3.1, B3.2, B3.3 and B) B3.4 and B3.5 obtained from B3 fraction. C) Fractions were grouped by similarity and B3.2 fraction was named F<sub>FINAL</sub>.

### 3.1. Chromatographic analysis of F<sub>FINAL</sub>

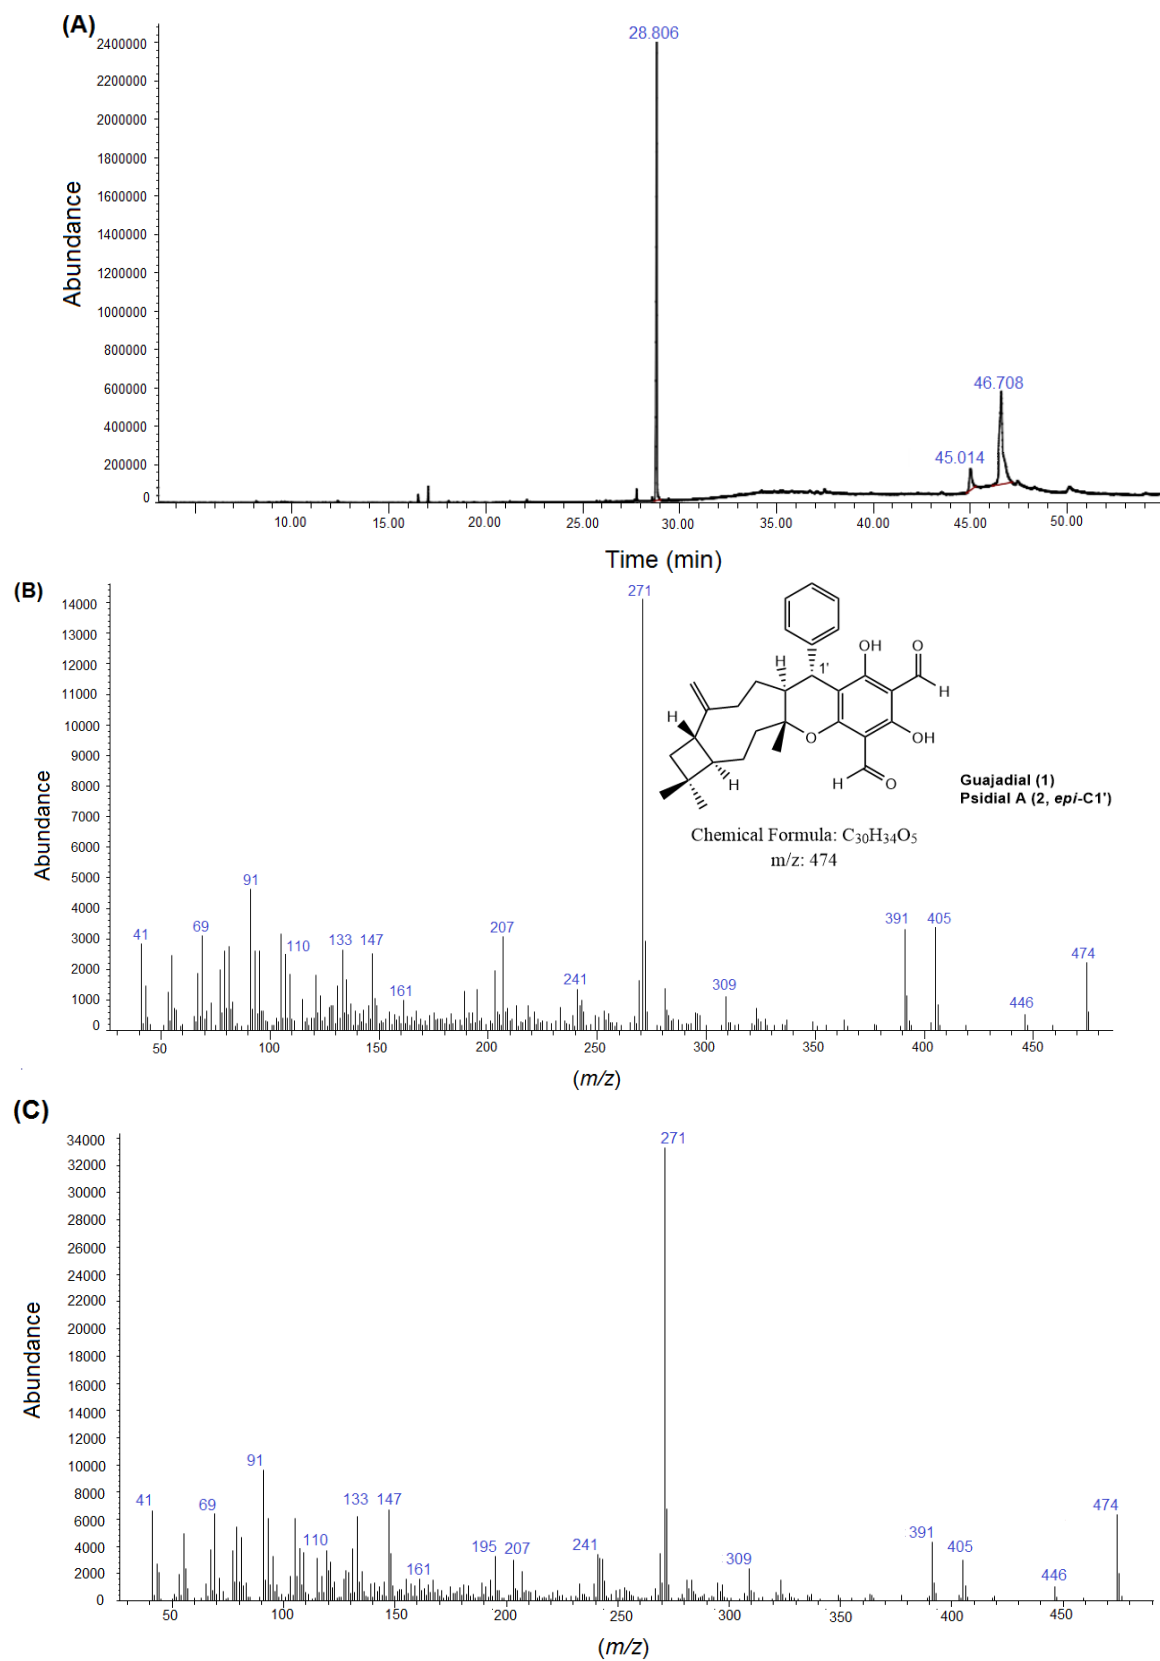

**Figure S4.** GC-MS analysis of F<sub>FINAL</sub> fraction. (A) Chromatography profile and tandem mass spectrum of ion [M+H]<sup>+</sup> *m/z* 474 at (B) 45.014 and (C) 46.706 min.

### 3.2. In vitro assays

#### 3.2.1. In vitro antiproliferative screening

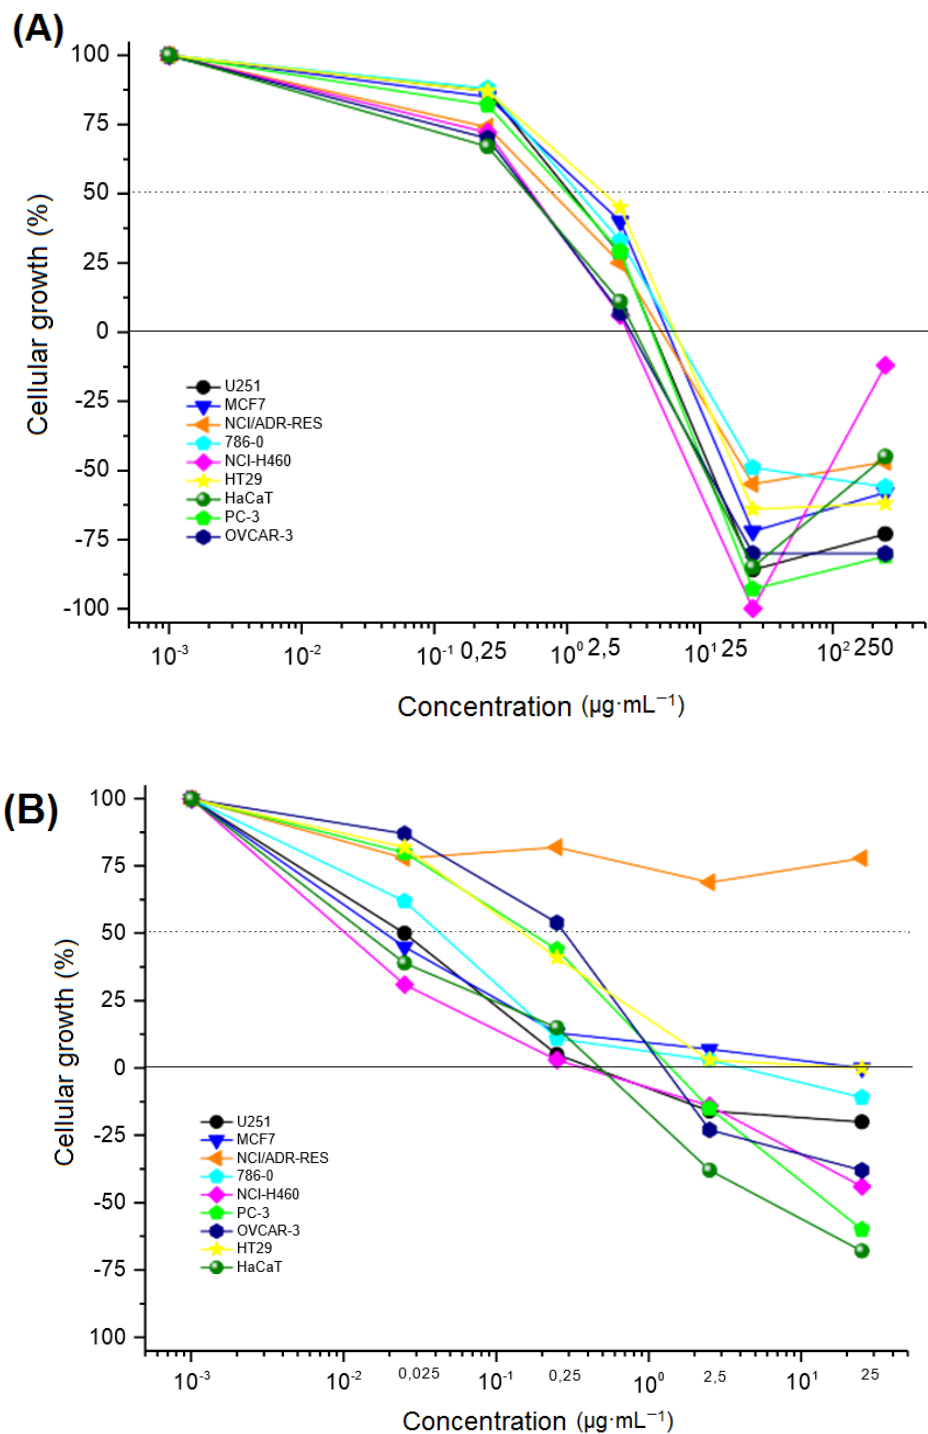

**Figure S5.** Antiproliferative activity of the  $F_{\text{FINAL}}$  fraction (A), from dichloromethane crude extract of *Psidium guajava* L. Doxorubicin (B) used as positive control. U251 (glioma), MCF-7 (breast), NCI-460 (lung, non-small cells), OVCAR-03 (ovarian), PC-3 (prostate), HT-29 (colon), 786-0 (renal), NCI-ADR/RES (ovarian expressing phenotype multiple drugs resistance), and HaCaT (human keratinocytes and immortalized nontumoral cells).

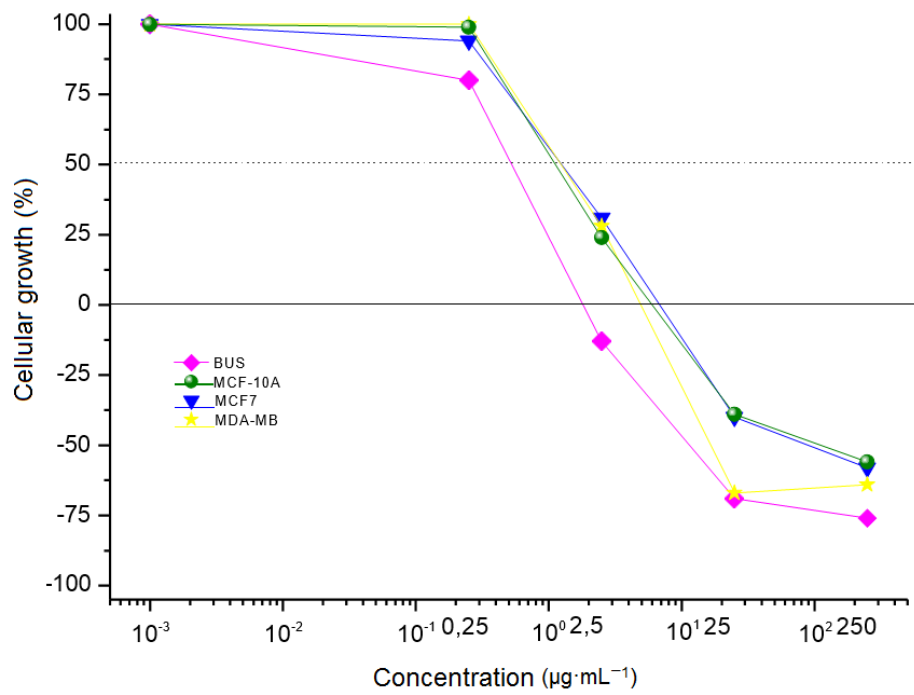

**Figure S6.** Antiproliferative activity of the  $F_{\text{FINAL}}$  fraction, from dichloromethane crude extract of *Psidium guajava* L. MCF-7 BUS (estradiol receptor overexpressing mammary adenocarcinoma), MCF-10A (breast non-tumoral), MCF-7 (breast) and MDA MB 231.
